# Supplementary material
Source: Springer Nature journal article supplement (https://www.springermedizin.de/resource/supplementary/12936_2010_1373_MOESM1_ESM.pdf/9549630)

## Moderate

Aggressive  
behaviour  
Vertigo  
Hyperactivity  
Sleeplessness (3x)

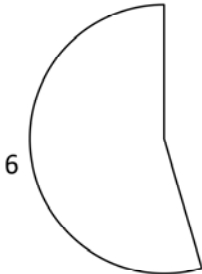

## Mild

Eating behaviour  
Dizziness  
Headache  
Sleeplessness  
Nightmares

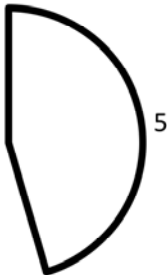

Supplement: MOESM1 [file 9549630]
